# Supplementary material for: Mechanistic study of the competition between carbon dioxide reduction and hydrogen evolution reaction and selectivity tuning via loading single-atom catalysts on graphitic carbon nitride
Source: Royal Society of Chemistry journal article supplement (doi:10.1039/d4nr01932f), 2024-01-01
Supplement: d4nr01932f1.pdf [file d4nr01932f1.pdf]

## Supporting Information

### **Mechanistic study on the competition between carbon dioxide reduction and hydrogen evolution reaction and selectivity tuning via single-atom catalyst loading on graphitic carbon nitride**

*Joel Jie Foo<sup>a,b</sup>, Sue-Faye Ng<sup>a,b</sup>, Mo Xiong<sup>c,\*</sup> and Wee-Jun Ong<sup>a,b,d,e,f,\*</sup>*

<sup>a</sup> School of Energy and Chemical Engineering, Xiamen University Malaysia, Sepang, Selangor Darul Ehsan, 43900, Malaysia.

<sup>b</sup> Center of Excellence for NaNo Energy & Catalysis Technology (CONNECT), Xiamen University Malaysia, Sepang, Selangor Darul Ehsan, 43900, Malaysia.

<sup>c</sup> MOE Key Laboratory for Non-Equilibrium Synthesis and Modulation of Condensed Matter, School of Physics, Xi'an Jiaotong University, Xi'an 710049 Shanxi, China.

<sup>d</sup> State Key Laboratory of Physical Chemistry of Solid Surfaces, College of Chemistry and Chemical Engineering, Xiamen University, Xiamen 361005, China.

<sup>e</sup> Gulei Innovation Institute, Xiamen University, Zhangzhou 363200, China.

<sup>f</sup> Shenzhen Research Institute of Xiamen University, Shenzhen, 518057, China.

\*Corresponding authors:

Wee-Jun Ong, Xiamen University Malaysia, Sepang, Selangor Darul Ehsan, Malaysia.

Email: [weejun.ong@xmu.edu.my](mailto:weejun.ong@xmu.edu.my)

Mo Xiong, Xi'an Jiaotong University, Xi'an, Shanxi, China.

Email: [xiongmo@xjtu.edu.cn](mailto:xiongmo@xjtu.edu.cn)

## List of Abbreviations

|                         |                                                                                              |
|-------------------------|----------------------------------------------------------------------------------------------|
| <b>AIMD</b>             | Ab initio molecular dynamics                                                                 |
| <b>CBM</b>              | Conduction band minimum                                                                      |
| <b>CN</b>               | g-C <sub>3</sub> N <sub>4</sub>                                                              |
| <b>CO<sub>2</sub>RR</b> | Carbon dioxide reduction reaction                                                            |
| <b>DFT</b>              | Density functional theory                                                                    |
| <b>DFT-D3</b>           | Empirical correlation in Grimme's scheme                                                     |
| <b>GGA-PBE</b>          | Generalized gradient approximation with Perdew-Burke-Ernzerhof exchange-correlation function |
| <b>HER</b>              | Hydrogen evolution reaction                                                                  |
| <b>M-SAC</b>            | Metal single-atom catalyst                                                                   |
| <b>PAW</b>              | Projected augmented wave                                                                     |
| <b>PDS</b>              | Potential determining steps                                                                  |
| <b>SAC</b>              | Single-atom catalyst                                                                         |
| <b>VASP</b>             | Vienna Ab initio Simulation Package                                                          |
| <b>VBM</b>              | Valence band maximum                                                                         |

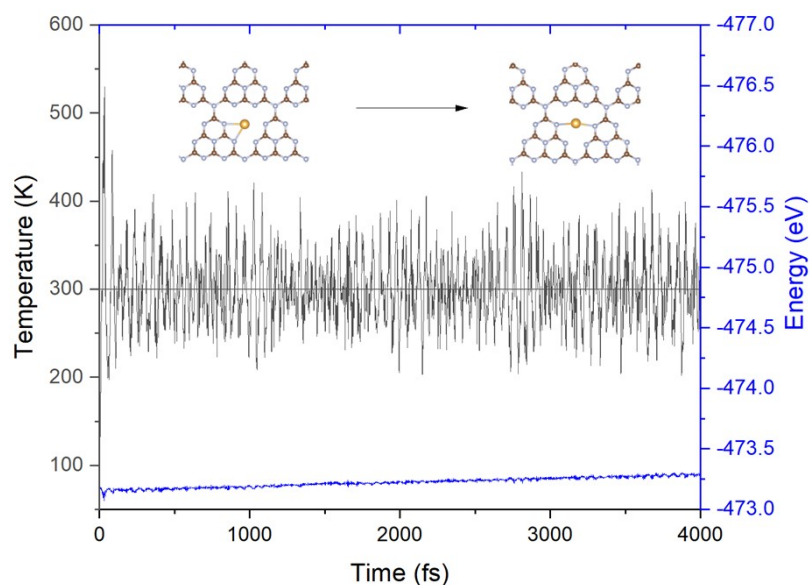

Fig. S1 AIMD evaluation of the AuCN system; Grey: temperature and Blue: energy evolution versus time, respectively. The AIMD simulation lasted 4000 fs at 300 K.

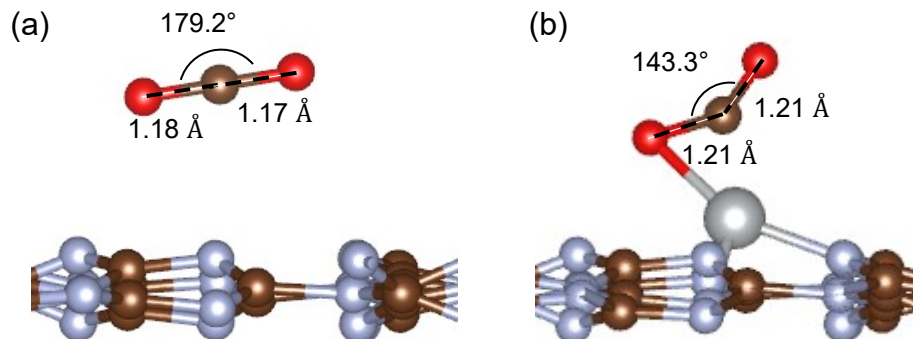

Fig. S2 The geometry-optimized model of the CO<sub>2</sub> adsorbed on the surface of the (a) CN and (b) NiCN system. The dashed line refers to the distance between the O and C molecules; the solid line refers to the angle of O-C-O.

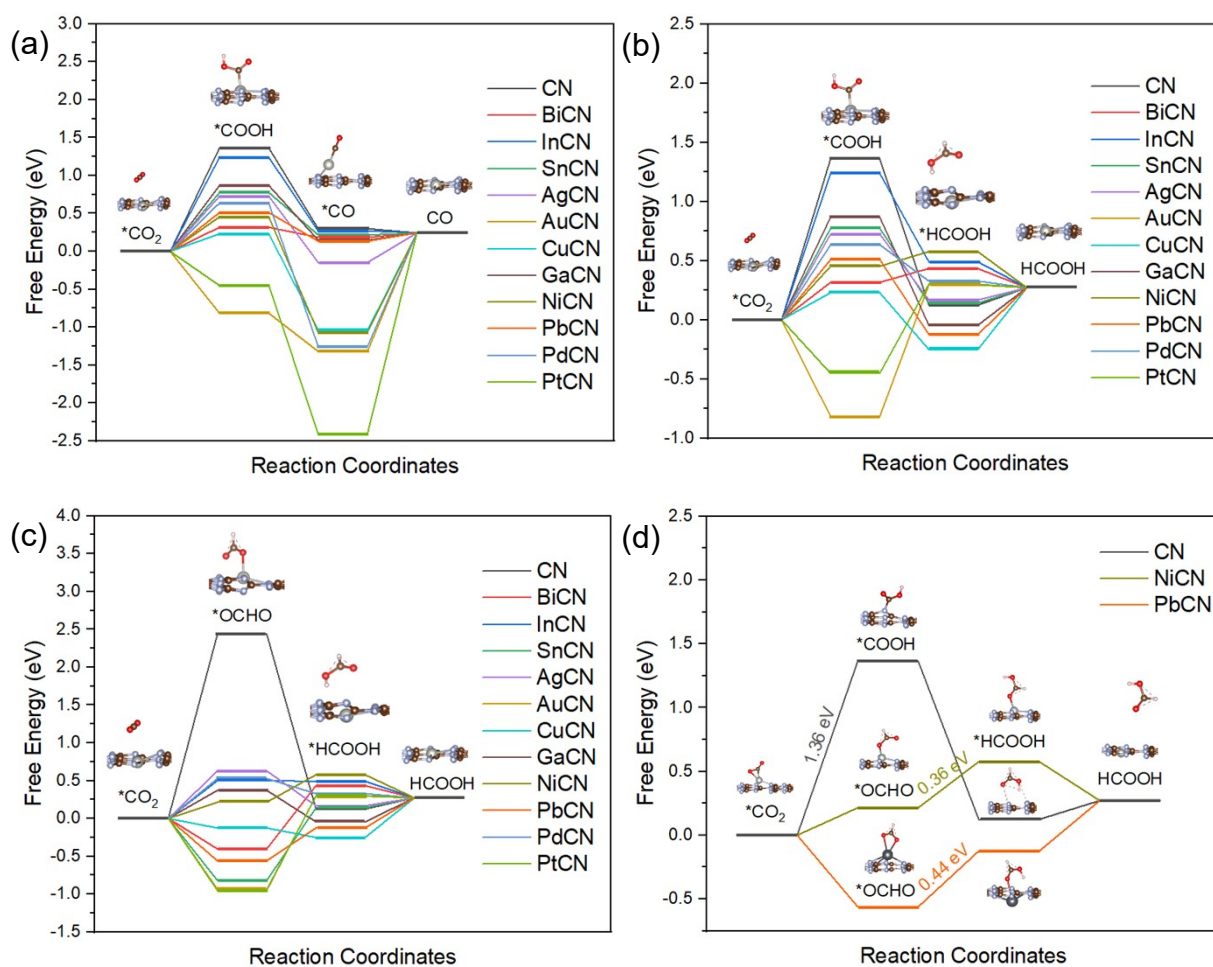

Fig. S3 Gibbs free energy of the CO<sub>2</sub>RR to (a) CO via Pathway 1 and HCOOH via (b) Pathway 2 and (c) Pathway 3 with different M-SACs loaded carbon nitride catalyst systems. (d) The comparison between Gibbs free energy of the pristine (Pathway 2) and the best performance MCN (M = Ni and Pb) (Pathway 3) to the formation of HCOOH.

Table S1 The distance between the M-SAC and the unsaturated N atoms.

| <b>Systems</b> | <b>M-N Distance (Å)</b> |
|----------------|-------------------------|
| BiCN           | 2.49 – 2.53             |
| InCN           | -                       |
| SnCN           | 2.47 – 2.57             |
| AgCN           | -                       |
| AuCN           | 2.26 – 2.27             |
| CdCN           | 2.41 – 2.52             |
| CuCN           | 2.08 – 2.09             |
| GaCN           | -                       |
| NiCN           | 1.89 – 1.90             |
| PbCN           | 2.56 – 2.76             |
| ZnCN           | 2.22 – 2.23             |
| PbCN           | 2.20 – 2.23             |
| PtCN           | 2.09 – 2.31             |

Table S2. Relative Gibbs free energy of the CN and MCN system for CO<sub>2</sub> conversion to CO via pathway 1 through the \*COOH intermediate. (Red font indicates the potential determining step for each of the system)

| System | Relative Gibbs Free Energy (eV) |            |          | PDS (eV) |
|--------|---------------------------------|------------|----------|----------|
|        | *CO <sub>2</sub> → *COOH        | *COOH → CO | *CO → CO |          |
| CN     | 1.3635                          | -1.0655    | -0.056   | 1.3635   |
| BiCN   | 0.3175                          | -0.1325    | 0.057    | 0.3175   |
| InCN   | 1.2385                          | -0.9705    | -0.026   | 1.2385   |
| SnCN   | 0.7745                          | -0.5585    | 0.026    | 0.7745   |
| AgCN   | 0.7255                          | -0.8725    | 0.389    | 0.7255   |
| AuCN   | -0.8165                         | -0.5035    | 1.562    | 1.562    |
| CdCN   | 0.3155                          | -0.1045    | 0.031    | 0.3155   |
| CuCN   | 0.2305                          | -1.2695    | 1.281    | 1.281    |
| GaCN   | 0.8675                          | -0.7195    | 0.094    | 0.8675   |
| NiCN   | 0.4535                          | -1.5255    | 1.314    | 1.314    |
| PbCN   | 0.5105                          | -0.3765    | 0.108    | 0.5105   |
| ZnCN   | -0.3415                         | 0.1335     | 0.45     | 0.45     |
| PdCN   | 0.6355                          | -1.8915    | 1.498    | 1.498    |
| PtCN   | -0.4525                         | -1.9535    | 2.648    | 2.648    |

\*PDS = Potential-determining step (the highest potential required for the transition state in the entire reaction path)

Table S3. Relative Gibbs free energy of the CN and MCN system for CO<sub>2</sub> conversion to HCOOH via pathway 2 through the \*COOH intermediate. (Red font indicates the potential-determining step for each of the system)

| System | Relative Gibbs Free Energy (eV) |            |          | PDS (eV) |
|--------|---------------------------------|------------|----------|----------|
|        | *CO <sub>2</sub> → *COOH        | *COOH → CO | *CO → CO |          |
| CN     | 1.3635                          | -1.2385    | 0.147    | 1.3635   |
| BiCN   | 0.3175                          | 0.1165     | -0.162   | 0.3175   |
| InCN   | 1.2385                          | -0.7475    | -0.219   | 1.2385   |
| SnCN   | 0.7745                          | -0.6325    | 0.13     | 0.7745   |
| AgCN   | 0.7255                          | -0.5565    | 0.103    | 0.7255   |
| AuCN   | -0.8165                         | 1.1115     | -0.023   | 1.1115   |
| CdCN   | 0.3155                          | -0.4005    | 0.357    | 0.357    |
| CuCN   | 0.2305                          | -0.4805    | 0.522    | 0.522    |
| GaCN   | 0.8675                          | -0.9125    | 0.317    | 0.8675   |
| NiCN   | 0.4535                          | 0.1235     | -0.305   | 0.4535   |
| PbCN   | 0.5105                          | -0.6345    | 0.396    | 0.5105   |
| ZnCN   | -0.3415                         | -0.3625    | 0.976    | 0.976    |
| PdCN   | 0.6355                          | -0.3075    | -0.056   | 0.6355   |
| PtCN   | -0.4525                         | 0.7535     | -0.029   | 0.7535   |

\*PDS = Potential-determining step (the highest potential required for the transition state in the entire reaction path)

Table S4. Relative Gibbs free energy of the CN and MCN system for CO<sub>2</sub> conversion to HCOOH via pathway 3 through the \*OCHO intermediate. (Red font indicates the potential-determining step for each of the system)

| System | Relative Gibbs Free Energy (eV) |         |          | PDS (eV) |
|--------|---------------------------------|---------|----------|----------|
|        | *CO <sub>2</sub> →              | *OCHO → | *HCOOH → |          |
|        | *OCHO                           | HCOOH   | HCOOH    |          |
| CN     | 2.4385                          | -2.3135 | 0.147    | 2.4385   |
| BiCN   | -0.4025                         | 0.8365  | -0.162   | 0.8365   |
| InCN   | 0.5015                          | -0.0105 | -0.219   | 0.5015   |
| SnCN   | -0.8195                         | 0.9615  | 0.13     | 0.9615   |
| AgCN   | 0.6285                          | -0.4595 | 0.103    | 0.6285   |
| AuCN   | -0.9345                         | 1.2295  | -0.023   | 1.2295   |
| CdCN   | -0.6455                         | 0.5605  | 0.357    | 0.5605   |
| CuCN   | -0.1255                         | -0.1245 | 0.522    | 0.522    |
| GaCN   | 0.3725                          | -0.4175 | 0.317    | 0.3725   |
| NiCN   | 0.2155                          | 0.3615  | -0.305   | 0.3615   |
| PbCN   | -0.5605                         | 0.4365  | 0.396    | 0.4365   |
| ZnCN   | -1.3135                         | 0.6095  | 0.976    | 0.976    |
| PdCN   | 0.5275                          | -0.1995 | -0.056   | 0.5275   |
| PtCN   | -0.9525                         | 1.2535  | -0.029   | 1.2535   |

\*PDS = Potential-determining step (the highest potential required for the transition state in the entire reaction path)
